# Supplementary material
Source: PubMed Central journal article supplement (PMC8597319)
Supplement: NIHMS1752502-supplement-supplemental_file.pdf [file NIHMS1752502-supplement-supplemental_file.pdf]

## **Supplemental Material**

### **Appendix 1. Inclusion and exclusion criteria**

**sFigure 1.** Study Design

**sFigure 2.** Participant flow of HBV-HIV co-infected North American adult longitudinal sample

**sFigure 3.** Change in fibrosis score by change in inflammation scores

**sTable 1.** Characteristics of HBV-HIV co-infected North American adult longitudinal sample versus study participants excluded due to lack of follow-up data, and those in the biopsy subsample versus those excluded due to lack of paired biopsy data.

**sTable 2.** Anti-HBV treatment as a component of cART over time

**sTable 3.** Characteristics of Participants with Clinical Outcome<sup>a</sup> or Incident Cirrhosis

**sTable 4.** Incidence rates of HBeAg loss among 67 HBeAg+ participants across follow-up by baseline characteristics

**sTable 5.** Select viral (qHBsAg, qHBeAg, HBV DNA) and clinical (ALT, APRI, FIB-4, Fibroscan) markers, by time point

**sTable 6.** Individual-level change in histological activity index (HAI)

**sTable 7.** Individual-level change in portal inflammation score

**sTable 8.** Individual-level change in periportal inflammation score

**sTable 9.** Individual-level change in lobular inflammation score

**sTable 10.** Individual-level change in confluent necrosis score

**sTable 11.** Individual-level change in fibrosis score

## **Appendix 1: Inclusion and exclusion criteria**

### Inclusion criteria:

- $\geq 18$  years of age;
- serologic evidence of HIV infection by HIV antibody positivity or history of positive HIV-RNA prior to screening;
- serologic evidence of chronic hepatitis B infection by HBsAg positivity;
- currently receiving any type of antiretroviral therapy for HBV or HIV; and
- willingness to provide informed consent.

### Exclusion criteria:

- estimated life expectancy of less than one year based on clinical judgment of the investigator;
- history of hepatic decompensation based on clinical or laboratory criteria;
- hepatocellular carcinoma (HCC);
- HCV RNA positive within 6 months prior to the baseline biopsy;
- history of solid organ or bone marrow transplantation;
- pregnant women;
- medical or social condition which, in the opinion of the study physician, would make the patient unsuitable for the study or interfere with or prevent follow-up per protocol;
- unable or unwilling to return for follow-up visits;
- contraindications to liver biopsy.

sFigure 1. Study Design

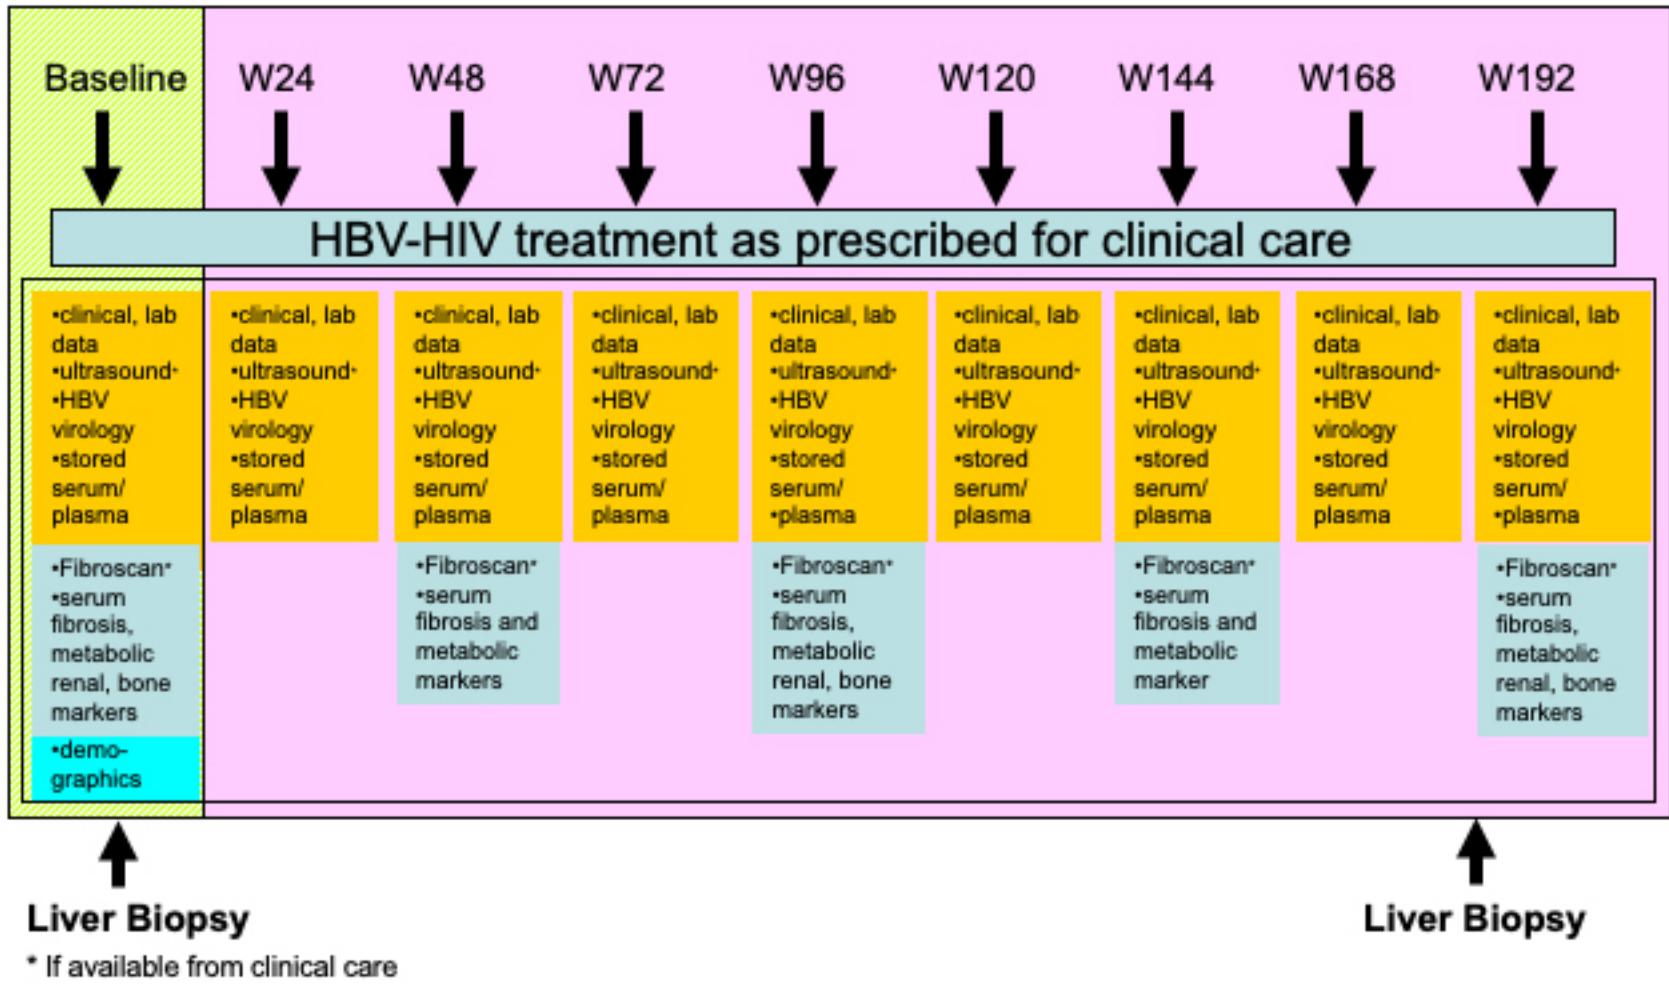

**sFigure 2.** Participant flow of HBV-HIV co-infected North American adult longitudinal sample

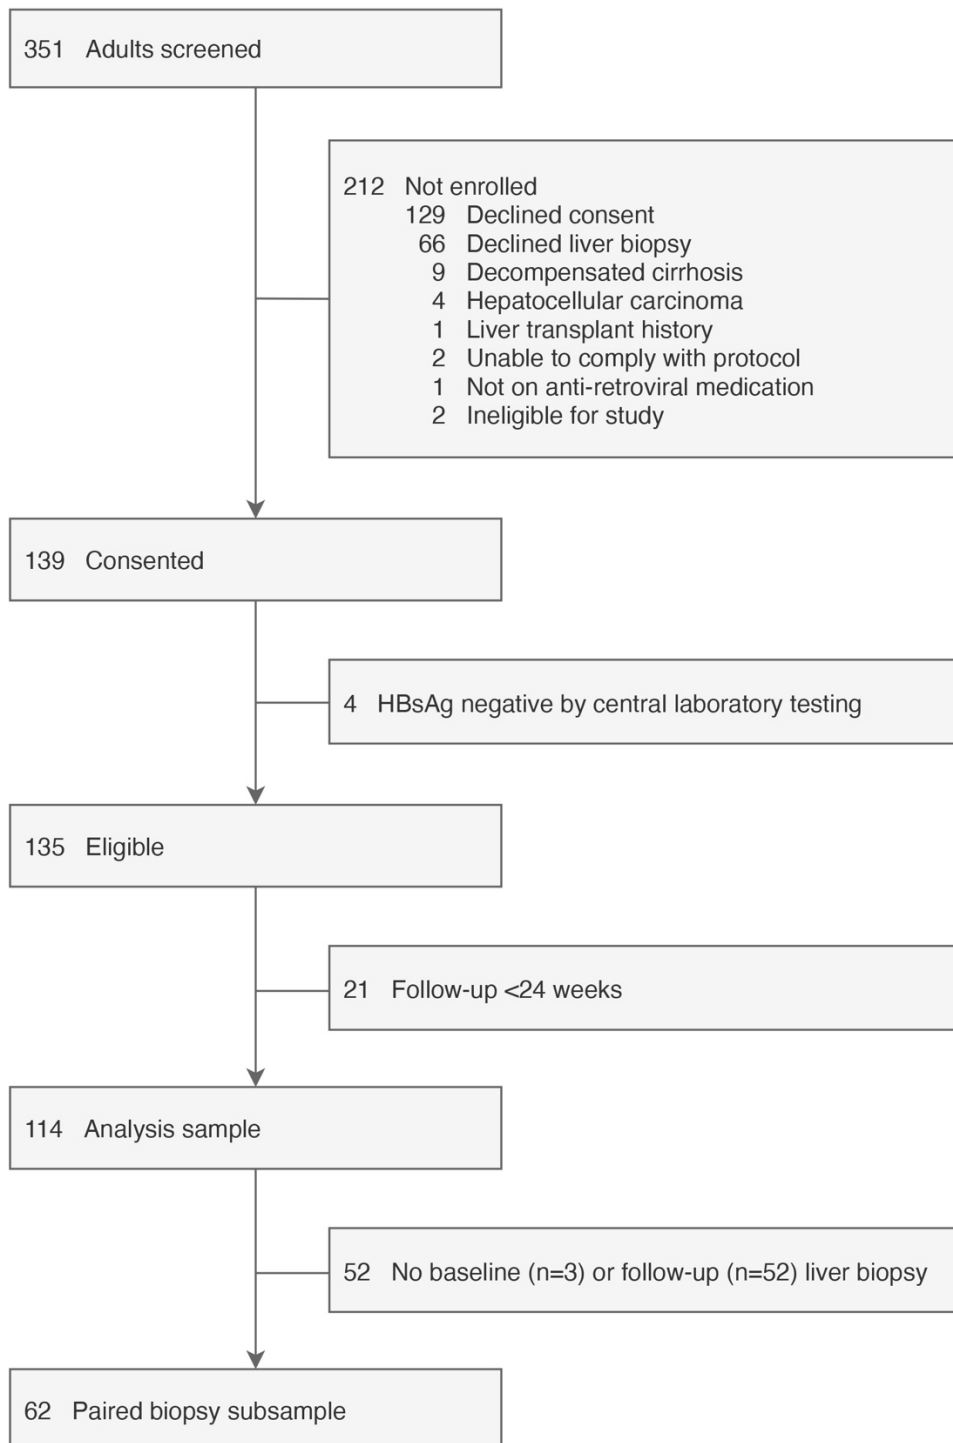

**sFigure 3.** Change in fibrosis score by change in inflammation scores (N=61)

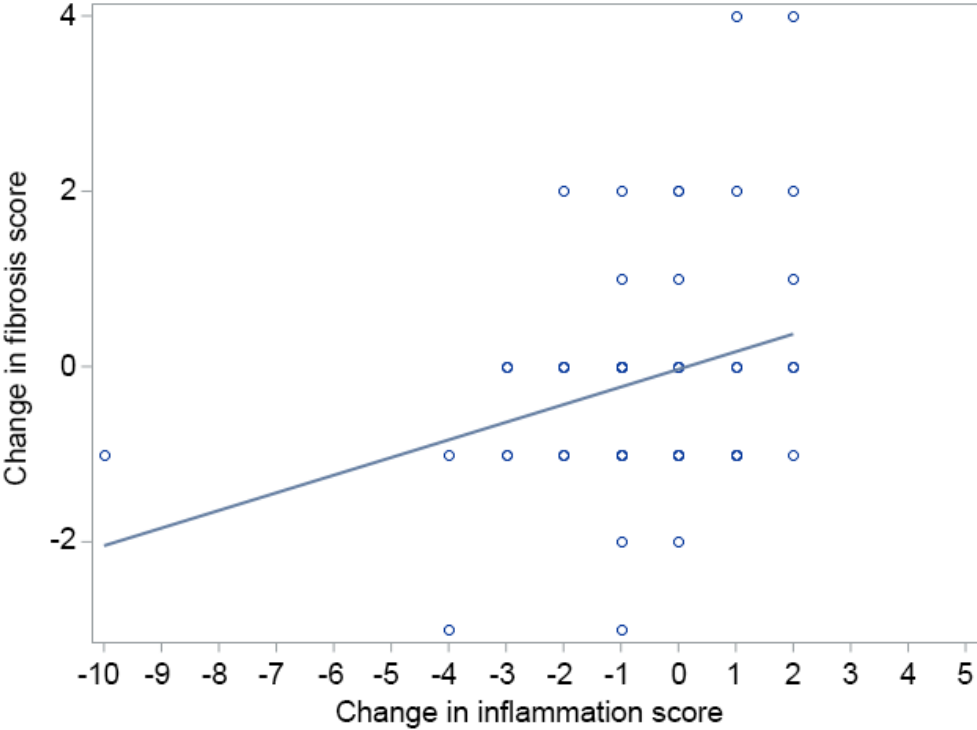

**sTable 1.** Characteristics of HBV-HIV co-infected North American adult longitudinal sample versus study participants excluded due to lack of follow-up data, and those in the biopsy subsample versus those excluded due to lack of paired biopsy data.

|                                      | Longitudinal Sample<br>n=114 <sup>a</sup> | Excluded due to lack of follow-up data<br>n=21 <sup>a</sup> | p-value           | Biopsy sample<br>n=62 <sup>a</sup> | Excluded due to lack of paired biopsies<br>n=52 <sup>a</sup> | p-value           |
|--------------------------------------|-------------------------------------------|-------------------------------------------------------------|-------------------|------------------------------------|--------------------------------------------------------------|-------------------|
| Age (years)                          |                                           |                                                             | 0.02              |                                    |                                                              | 0.44              |
| Median (IQR)                         | 49 (45: 55)                               | 44 (40: 50)                                                 |                   | 50 (46: 54)                        | 48 (43: 55.5)                                                |                   |
| Sex                                  |                                           |                                                             | 0.54              |                                    |                                                              | 0.34              |
| Male                                 | 104 (91.2%)                               | 20 (95.2%)                                                  |                   | 58 (93.5%)                         | 46 (88.5%)                                                   |                   |
| Female                               | 10 (8.8%)                                 | 1 (4.8%)                                                    |                   | 4 (6.5%)                           | 6 (11.5%)                                                    |                   |
| Race                                 | n=111                                     | n=20                                                        | 0.77              | n=60                               | n=51                                                         | 0.55              |
| Non-Hispanic White                   | 36 (32.4%)                                | 6 (30.0%)                                                   |                   | 17 (28.3%)                         | 19 (37.3%)                                                   |                   |
| Non-Hispanic Black                   | 57 (51.4%)                                | 11 (55.0%)                                                  |                   | 32 (53.3%)                         | 25 (49.0%)                                                   |                   |
| Non-Hispanic Asian                   | 5 (4.5%)                                  | 0 (0.0%)                                                    |                   | 4 (6.7%)                           | 1 (2.0%)                                                     |                   |
| Other                                | 13 (11.7%)                                | 3 (15.0%)                                                   |                   | 7 (11.7%)                          | 6 (11.8%)                                                    |                   |
| Coffee cups per day                  | n=112                                     |                                                             | 0.87              | n=61                               | n=51                                                         | 0.39              |
| None/ <1 per day                     | 56 (50.0%)                                | 11 (52.4%)                                                  |                   | 31 (50.8%)                         | 25 (49.0%)                                                   |                   |
| 1 to 2 per day                       | 38 (33.9%)                                | 6 (28.6%)                                                   |                   | 18 (29.5%)                         | 20 (39.2%)                                                   |                   |
| 3 or more per day                    | 18 (16.1%)                                | 4 (19.0%)                                                   |                   | 12 (19.7%)                         | 6 (11.8%)                                                    |                   |
| Alcohol                              |                                           |                                                             | 0.72              |                                    |                                                              | 0.07              |
| None                                 | 63 (55.3%)                                | 10 (47.6%)                                                  |                   | 31 (50.0%)                         | 32 (61.5%)                                                   |                   |
| Moderate                             | 36 (31.6%)                                | 7 (33.3%)                                                   |                   | 25 (40.3%)                         | 11 (21.2%)                                                   |                   |
| At-Risk                              | 15 (13.2%)                                | 4 (19.0%)                                                   |                   | 6 (9.7%)                           | 9 (17.3%)                                                    |                   |
| Body mass index (kg/m <sup>2</sup> ) | n=109                                     | n=20                                                        | 0.81              | n=60                               | n=49                                                         | 0.40              |
| Median (IQR)                         | 25.9 (22.5: 30.3)                         | 25.3 (22.2: 31.2)                                           |                   | 25.8 (22.7: 29.1)                  | 27.3 (21.4: 32.5)                                            |                   |
| Weight status (race-adjusted)        | n=109                                     | n=20                                                        | 0.73              | n=60                               | n=49                                                         | 0.08              |
| Under/Normal                         | 44 (40.4%)                                | 9 (45.0%)                                                   |                   | 24 (40.0%)                         | 20 (40.8%)                                                   |                   |
| Overweight                           | 37 (33.9%)                                | 5 (25.0%)                                                   |                   | 25 (41.7%)                         | 12 (24.5%)                                                   |                   |
| Obese                                | 28 (25.7%)                                | 6 (30.0%)                                                   |                   | 11 (18.3%)                         | 17 (34.7%)                                                   |                   |
| Lipodystrophy grade                  | n=103                                     | n=17                                                        | 0.44 <sup>b</sup> | n=56                               | n=47                                                         | 0.22 <sup>b</sup> |
| None                                 | 87 (84.5%)                                | 13 (76.5%)                                                  |                   | 45 (80.4%)                         | 42 (89.4%)                                                   |                   |
| Mild                                 | 10 (9.7%)                                 | 3 (17.6%)                                                   |                   | 7 (12.5%)                          | 3 (6.4%)                                                     |                   |
| Moderate or severe                   | 6 (5.8%)                                  | 1 (5.9%)                                                    |                   | 4 (7.1%)                           | 2 (4.3%)                                                     |                   |
| Diabetes                             | 10 (8.8%)                                 | 2 (9.5%)                                                    | 0.91              | 4 (6.5%)                           | 6 (11.5%)                                                    | 0.34              |

|                                                               |                  |                 |       |                |                |      |
|---------------------------------------------------------------|------------------|-----------------|-------|----------------|----------------|------|
| Hyperlipidemia                                                | 34 (29.8%)       | 6 (28.6%)       | 0.91  | 17 (27.4%)     | 17 (32.7%)     | 0.54 |
| Sexually transmitted HBV or HIV                               | 101 (95.3%)      | 16 (76.2%)      | 0.003 | 57 (100.0%)    | 44 (89.8%)     | 0.01 |
| Estimated duration of HIV or HBV infection (years)            | n=107            | n=16            | 0.03  | n=57           | n=50           | 0.04 |
| Median (IQR)                                                  | 20 (13: 26)      | 13.5 (10: 19.5) |       | 22 (16: 28)    | 18 (10: 25)    |      |
| HBV treatment                                                 |                  |                 | 0.65  |                |                | 0.08 |
| None <sup>b</sup>                                             | 3 (2.6%)         | 1 (4.8%)        |       | 0 (0.0%)       | 3 (5.8%)       |      |
| Tenofovir alone or in combination                             | 96 (84.2%)       | 18 (85.7%)      |       | 56 (90.3%)     | 40 (76.9%)     |      |
| Lamivudine and Entecavir                                      | 9 (7.9%)         | 0 (0.0%)        |       | 4 (6.5%)       | 5 (9.6%)       |      |
| Lamivudine alone                                              | 3 (2.6%)         | 1 (4.8%)        |       | 0 (0.0%)       | 3 (5.8%)       |      |
| Entecavir alone                                               | 3 (2.6%)         | 1 (4.8%)        |       | 2 (3.2%)       | 1 (1.9%)       |      |
| Nucleoside/Nucleotide Reverse Transcriptase Inhibitors (NRTI) | 109 (95.6%)      | 19 (90.5%)      |       | 60 (96.8%)     | 49 (94.2%)     |      |
| Non-Nucleoside Reverse Transcriptase Inhibitors (NNRTI)       | 38 (33.3%)       | 6 (28.6%)       |       | 23 (37.1%)     | 15 (28.8%)     |      |
| Protease inhibitors                                           | 53 (46.5%)       | 8 (38.1%)       |       | 31 (50.0%)     | 22 (42.3%)     |      |
| <b>Liver Related Tests</b>                                    |                  |                 |       |                |                |      |
| ALT (U/L)                                                     | n=110            | n=19            | 0.17  | n=61           | n=49           | 0.10 |
| Median (IQR)                                                  | 27 (19: 42)      | 33 (28: 44)     |       | 24 (18: 36)    | 28 (22: 44)    |      |
| AST (U/L)                                                     | n=110            | n=19            | 0.26  | n=61           | n=49           | 0.20 |
| Median (IQR)                                                  | 29 (22: 41)      | 31 (26: 52)     |       | 27 (22: 41)    | 31 (24: 40)    |      |
| AST/ALT ratio                                                 | n=110            | n=19            | 0.40  | n=61           | n=49           | 0.17 |
| Median (IQR)                                                  | 1.0 (0.8: 1.3)   | 0.9 (0.8: 1.1)  |       | 1.0 (0.9: 1.4) | 1.0 (0.8: 1.2) |      |
| Alkaline phosphatase (U/L)                                    | n=109            | n=19            | 0.76  | n=60           | n=49           | 0.5  |
| Median (IQR)                                                  | 85 (68: 107)     | 84 (75: 96)     |       | 82 (63: 110)   | 90 (71: 106)   |      |
| Total bilirubin (mg/dL)                                       | n=109            | n=19            | 0.18  | n=60           | n=49           | 0.42 |
| Median (IQR)                                                  | 0.4 (0.3: 0.7)   | 0.6 (0.4: 0.8)  |       | 0.5 (0.3: 0.7) | 0.4 (0.3: 0.6) |      |
| Albumin (g/dL)                                                | n=110            | n=19            | 0.72  | n=61           | n=49           | 0.16 |
| Median (IQR)                                                  | 4.3 (4.1: 4.6)   | 4.3 (4.1: 4.6)  |       | 4.4 (4.2: 4.6) | 4.3 (4.1: 4.5) |      |
| Platelets (x10 <sup>3</sup> /mm <sup>3</sup> )                | n=112            | n=18            | 0.33  | n=61           | n=51           | 0.98 |
| Median (IQR)                                                  | 200.5 (175: 238) | 192 (164: 218)  |       | 200 (174: 248) | 202 (175: 234) |      |
| APRI                                                          | n=110            | n=18            | 0.14  | n=61           | n=49           | 0.45 |
| Median (IQR)                                                  | 0.3 (0.3: 0.5)   | 0.4 (0.3: 0.6)  |       | 0.3 (0.3: 0.5) | 0.4 (0.3: 0.6) |      |
| FIB-4                                                         | n=110            | n=18            | 0.96  | n=61           | n=49           | 0.93 |

|                                                      |                   |                   |       |                   |                   |      |
|------------------------------------------------------|-------------------|-------------------|-------|-------------------|-------------------|------|
| Median (IQR)                                         | 1.4 (1.0: 1.9)    | 1.2 (1.0: 1.8)    |       | 1.4 (1.0: 1.9)    | 1.5 (1.0: 1.9)    |      |
| VCTE (kPa)                                           | n=69              | n=7               | 0.37  | n=46              | n=23              | 0.57 |
| Median (IQR)                                         | 5.4 (4.0: 6.9)    | 6.3 (4.1: 18.4)   |       | 5.4 (4.1: 6.4)    | 5.7 (3.8: 9.0)    |      |
| <b>HIV related tests</b>                             |                   |                   |       |                   |                   |      |
| CD4 (cells/mm <sup>3</sup> )                         | n=101             | n=15              | 0.79  | n=58              | n=43              | 0.82 |
| Median (IQR)                                         | 562 (366: 707)    | 585 (252: 697)    |       | 564.5 (374: 678)  | 525 (288: 815)    |      |
| CD4 %                                                | n=102             | n=15              | 0.84  | n=59              | n=43              | 0.33 |
| Median (IQR)                                         | 25.2 (18.0: 36.0) | 23.3 (18.0: 39.0) |       | 25.9 (21.0: 36.3) | 24.0 (16.0: 34.0) |      |
| CD8 (cells/mm <sup>3</sup> )                         | n=66              | n=11              | 0.38  | n=39              | n=27              | 0.56 |
| Median (IQR)                                         | 878.5 (595: 1243) | 644 (555: 938)    |       | 843 (560: 1139)   | 920 (595: 1272)   |      |
| CD8 %                                                | n=67              | n=11              | 0.87  | n=40              | n=27              | 0.61 |
| Median (IQR)                                         | 44.0 (36.4: 53.0) | 45.0 (35.0: 50.3) |       | 43.0 (35.0: 54.5) | 45.0 (39.0: 53.0) |      |
| HIV stage                                            | n=86              | n=17              | 0.70  | n=45              | n=41              | 0.99 |
| 1 (≥500 cells/mm <sup>3</sup> )                      | 59 (68.6%)        | 10 (58.8%)        |       | 31 (68.9%)        | 28 (68.3%)        |      |
| 2 (250-499 cells/mm <sup>3</sup> )                   | 13 (15.1%)        | 4 (23.5%)         |       | 7 (15.6%)         | 6 (14.6%)         |      |
| 3 (200-349 cells/mm <sup>3</sup> )                   | 6 (7.0%)          | 2 (11.8%)         |       | 3 (6.7%)          | 3 (7.3%)          |      |
| 4 (<200 cells/mm <sup>3</sup> )                      | 8 (9.3%)          | 1 (5.9%)          |       | 4 (8.9%)          | 4 (9.8%)          |      |
| HIV RNA (copies/mL)                                  | n=104             | n=16              | 0.004 | n=56              | n=48              | 0.48 |
| <20                                                  | 81 (77.9%)        | 8 (50.0%)         |       | 46 (82.1%)        | 35 (72.9%)        |      |
| 20 - <400                                            | 16 (15.4%)        | 3 (18.8%)         |       | 7 (12.5%)         | 9 (18.8%)         |      |
| 400 - <10000                                         | 4 (3.8%)          | 1 (6.3%)          |       | 1 (1.8%)          | 3 (6.3%)          |      |
| ≥10000                                               | 3 (2.9%)          | 4 (25.0%)         |       | 2 (3.6%)          | 1 (2.1%)          |      |
| <b>Viral serologies</b>                              |                   |                   |       |                   |                   |      |
| Anti-HCV                                             | n=105             | n=19              | 0.77  | n=58              | n=47              | 0.83 |
| Positive                                             | 4 (3.8%)          | 1 (5.3%)          |       | 2 (3.4%)          | 2 (4.3%)          |      |
| Anti-+                                               | n=72              | n=14              | 0.66  | n=42              | n=30              | 0.23 |
| Positive                                             | 1 (1.4%)          | 0 (0.0%)          |       | 0 (0.0%)          | 1 (3.3%)          |      |
| Anti-HBe                                             | n=103             | n=19              | 0.94  | n=56              | n=47              | 0.32 |
| Positive                                             | 28 (27.2%)        | 5 (26.3%)         |       | 13 (23.2%)        | 15 (31.9%)        |      |
| HBeAg                                                |                   |                   | 0.047 |                   |                   | 0.72 |
| Positive                                             | 70 (61.4%)        | 8 (38.1%)         |       | 39 (62.9%)        | 31 (59.6%)        |      |
| HBeAg (log <sub>10</sub> IU/mL) among positive HBeAg | n=69              | n=6               | 0.07  | n=39              | n=30              | 0.02 |
| Median (IQR)                                         | 1.3 (0.3: 2.5)    | 0.7 (0.0: 1.0)    |       | 0.8 (0.1: 1.8)    | 1.9 (0.9: 2.8)    |      |
| HBsAg (log <sub>10</sub> IU/mL)                      | n=112             | n=17              | 0.51  | n=61              | n=51              | 0.19 |



|                                           |                |                |      |                |                |      |
|-------------------------------------------|----------------|----------------|------|----------------|----------------|------|
| Median(IQR)                               | 3.3 (2.7: 4.0) | 3.2 (2.4: 3.6) |      | 3.2 (2.6: 3.5) | 3.5 (2.7: 4.4) |      |
| HBV DNA (IU/mL)                           |                |                | 0.20 |                |                | 0.18 |
| <20                                       | 70 (61.4%)     | 11 (52.4%)     |      | 43 (69.4%)     | 27 (51.9%)     |      |
| 20-999                                    | 21 (18.4%)     | 8 (38.1%)      |      | 10 (16.1%)     | 11 (21.2%)     |      |
| 1000-20,000                               | 8 (7.0%)       | 1 (4.8%)       |      | 2 (3.2%)       | 6 (11.5%)      |      |
| >20,000                                   | 15 (13.2%)     | 1 (4.8%)       |      | 7 (11.3%)      | 8 (15.4%)      |      |
| HBV DNA (log10 IU/mL)<br>(≥20 IU/mL)      | n=44           | n=10           | 0.06 | n=19           | n=25           | 0.76 |
| Median (IQR)                              | 3.4 (1.8: 5.3) | 2.0 (1.6: 2.5) |      | 2.1 (1.7: 6.3) | 3.5 (2.3: 5.1) |      |
| HBV DNA and HIV RNA<br>suppression status | n=95           | n=9            | 0.61 | n=53           | n=42           | 0.15 |
| Suppressed                                | 73 (76.8%)     | 8 (88.9%)      |      | 44 (83.0%)     | 29 (69.0%)     |      |
| Incomplete suppression                    | 8 (8.4%)       | 0 (0.0%)       |      | 2 (3.8%)       | 6 (14.3%)      |      |
| Not suppressed                            | 14 (14.7%)     | 1 (11.1%)      |      | 7 (13.2%)      | 7 (16.7%)      |      |

Abbreviations: ALT, Alanine aminotransferase; APRI, AST-platelet-ratio index; AST, Aspartate aminotransferase; CD4, Cluster of differentiation 4; CD8, cluster of differentiation 8; DNA, Deoxyribonucleic acid; FIB-4, Fibrosis index based on four factors; HBeAg, Hepatitis B e-antigen; HBsAg, Hepatitis B surface antigen; HBV, Hepatitis B virus; HCV, Hepatitis C virus; HDV, Hepatitis D virus; HIV, Human immunodeficiency virus; Hs-CRP, High-sensitivity C-reactive protein; q, Quantitative; Qual, Qualitative; RNA, Ribonucleic acid; ULN, Upper limit of normal.

<sup>a</sup> Data presented among this sample unless a subset is indicated due to missing data.

<sup>b</sup> Jonckheere-Terpstra Test

**sTable 2.** Anti-HBV medications and cART use over time

|                                                                     | <b>Baseline</b><br>n=114 | <b>Week 24</b><br>n=109 | <b>Week 48</b><br>n=100 | <b>Week 72</b><br>n=97 | <b>Week 96</b><br>n=87 | <b>Week 120</b><br>n=82 | <b>Week 144</b><br>n=77 | <b>Week 168</b><br>n=64 | <b>Week 192</b><br>n=50 |
|---------------------------------------------------------------------|--------------------------|-------------------------|-------------------------|------------------------|------------------------|-------------------------|-------------------------|-------------------------|-------------------------|
| Anti-HBV medications, n (%)                                         |                          |                         |                         |                        |                        |                         |                         |                         |                         |
| None <sup>a</sup>                                                   | 3 (2.6)                  | 6 (5.5)                 | 4 (4.0)                 | 4 (4.1)                | 5 (5.8)                | 5 (6.1)                 | 1 (1.3)                 | 1 (1.6)                 | 0 (0.0)                 |
| Lamivudine alone <sup>b</sup>                                       | 3 (2.6)                  | 2 (1.8)                 | 2 (2.0)                 | 1 (1.0)                | 1 (1.2)                | 1 (1.2)                 | 0 (0.0)                 | 0 (0.0)                 | 0 (0.0)                 |
| Tenofovir alone/combo                                               | 96 (84.2)                | 88 (80.7)               | 84 (84.0)               | 83 (85.6)              | 75 (86.2)              | 71 (86.6)               | 71 (92.2)               | 59 (92.2)               | 48 (96.0)               |
| Entecavir alone/combo                                               | 12 (10.5)                | 13 (11.9)               | 10 (10.0)               | 9 (9.3)                | 6 (6.9)                | 5 (6.1)                 | 5 (6.5)                 | 4 (6.3)                 | 2 (4.0)                 |
| cART including an anti-HBV nucleoside or nucleotide analogue, n (%) |                          |                         |                         |                        |                        |                         |                         |                         |                         |
| No                                                                  | 6 (5.3)                  | 8 (7.3)                 | 6 (6.0)                 | 5 (5.2)                | 6 (6.9)                | 6 (7.3)                 | 1 (1.3)                 | 1 (1.6)                 | 0 (0.0)                 |
| Yes                                                                 | 108 (94.7)               | 101 (92.7)              | 94 (94.0)               | 92 (94.9)              | 81 (93.1)              | 76 (92.7)               | 76 (98.7)               | 63 (98.4)               | 50 (100.0)              |

<sup>a</sup>Those who reported no anti-HBV medication usually reported anti-HIV medication. At baseline, among the three participants not reporting anti-HBV medication, one reported Norvir (Ritonavir), one reported darunavir, ritonavir, emtricitabine, dolutegravir) and one reported a history of Tenofovir but no current anti-viral medication. There were 13 participants who were not on any HBV medication at one or more assessments. There were 15 participants who were not cART including an anti-HBV nucleoside or nucleotide analogue at one or more assessments

<sup>b</sup>Among participants taking Lamivudine alone, none were taking Emtricitabine.

**sTable 3.** Characteristics of Participants with Clinical Outcome<sup>a</sup> or Incident Cirrhosis

| ID  | Sex<br>Age<br>(yrs) | Race | Cirrhosis ≤<br>24 Wks | HBeAg at<br>Wk 0 | Outcomes<br>(Timing, Wk)                               | HBV DNA, log <sub>10</sub><br>IU/mL<br>Wk 0 /<br>At outcome(s) | ALT x ULN<br>Wk 0 /<br>At outcome(s) | Platelet<br>x10 <sup>3</sup> /mm <sup>3</sup><br>Wk 0 /<br>At outcome(s) | Treatment<br>Wk 0 /<br>At outcome(s) |
|-----|---------------------|------|-----------------------|------------------|--------------------------------------------------------|----------------------------------------------------------------|--------------------------------------|--------------------------------------------------------------------------|--------------------------------------|
| 118 | M<br>50             | A    | Yes                   | Neg              | HCC (10)                                               | BLQ / BLQ                                                      | 0.9 / 0.9                            | 276 / 276                                                                | Yes / Yes                            |
| 208 | M<br>52             | W    | Yes                   | Pos              | Decompensation<br>(110), HCC (112),<br>HBV death (157) | 10.1 / Unknown<br>(all 3)                                      | 2.6 / 1.0, 1.0,<br>Unknown           | 101 / 67, 67,<br>Unknown                                                 | Yes / Yes, Yes,<br>No                |
| 038 | M<br>44             | O    | No                    | Neg              | Cirrhosis <sup>b</sup> (145)                           | BLQ / BLQ                                                      | 0.8 / 0.8                            | 164 / 123                                                                | Yes / Yes                            |

<sup>a</sup>Hepatic decompensation, HCC, liver transplant or HBV-related death

<sup>b</sup>Presence of ascites, splenomegaly and nodular liver documented by CT, MRI or liver ultrasound report

BLQ = below lower limit of detection or lower limit of quantification.

**sTable 4.** Incidence rates of HBeAg loss among 67 HBeAg+ participants across follow-up by baseline characteristics

| Baseline Characteristic                        |                    | No. of Participants | No. w/ Outcome | Total PYR | Incidence/100 PYR (95% CI) <sup>a</sup> |
|------------------------------------------------|--------------------|---------------------|----------------|-----------|-----------------------------------------|
| Age (years)                                    | ≤50                | 38                  | 5              | 94        | 5.33 (2.22, 12.81)                      |
|                                                | >50                | 29                  | 8              | 81        | 9.91 (4.96, 19.82)                      |
| Sex                                            | Male               | 59                  | 12             | 155       | 7.76 (4.41, 13.66)                      |
|                                                | Female             | 8                   | 1              | 20        | 5.06 (0.71, 35.89)                      |
| Race                                           | Non-Hispanic White | 23                  | 4              | 64        | 6.27 (2.35, 16.70)                      |
|                                                | Non-Hispanic Black | 32                  | 6              | 79        | 7.56 (3.40, 16.83)                      |
|                                                | Other              | 11                  | 2              | 28        | 7.03 (1.76, 28.10)                      |
| ALT (ULN)                                      | ≤1                 | 36                  | 8              | 104       | 7.72 (3.86, 15.44)                      |
|                                                | >1                 | 29                  | 5              | 65        | 7.66 (3.19, 18.39)                      |
| AST (ULN)                                      | ≤1                 | 51                  | 9              | 137       | 6.59 (3.43, 12.67)                      |
|                                                | >1                 | 14                  | 4              | 32        | 12.37 (4.64, 32.95)                     |
| Platelets (x10 <sup>3</sup> /mm <sup>3</sup> ) | <200               | 36                  | 5              | 92        | 5.42 (2.26, 13.03)                      |
|                                                | ≥200               | 31                  | 8              | 82        | 9.72 (4.86, 19.44)                      |
| APRI                                           | ≤0.5               | 50                  | 10             | 138       | 7.24 (3.90, 13.46)                      |
|                                                | >0.5               | 15                  | 3              | 31        | 9.73 (3.14, 30.17)                      |
| FIB-4                                          | <1.45              | 34                  | 6              | 89        | 6.76 (3.04, 15.04)                      |
|                                                | ≥1.45              | 31                  | 7              | 80        | 8.74 (4.17, 18.33)                      |
| qHBsAg (log <sub>10</sub> IU/mL)               | <3                 | 12                  | 4              | 35        | 11.40 (4.28, 30.37)                     |
|                                                | ≥3                 | 54                  | 9              | 136       | 6.62 (3.44, 12.72)                      |
| HBV DNA suppression                            | No                 | 21                  | 4              | 45        | 8.96 (3.36, 23.88)                      |

| <b>Baseline Characteristic</b>         |      | <b>No. of Participants</b> | <b>No. w/ Outcome</b> | <b>Total PYR</b> | <b>Incidence/100 PYR (95% CI) <sup>a</sup></b> |
|----------------------------------------|------|----------------------------|-----------------------|------------------|------------------------------------------------|
|                                        | Yes  | 46                         | 9                     | 130              | 6.93 (3.61, 13.32)                             |
| <b>CD4 (cells/mm<sup>3</sup>)</b>      | <500 | 28                         | 4                     | 80               | 5.00 (1.88, 13.33)                             |
|                                        | ≥500 | 32                         | 9                     | 80               | 11.30 (5.88, 21.72)                            |
| <b>CD4 (%)</b>                         | <20  | 27                         | 1                     | 65               | 1.55 (0.22, 10.98)                             |
|                                        | ≥20  | 40                         | 12                    | 110              | 10.92 (6.20, 19.23)                            |
| <b>HIV RNA suppression</b>             | No   | 17                         | 1                     | 44               | 2.28 (0.32, 16.19)                             |
|                                        | Yes  | 44                         | 10                    | 113              | 8.84 (4.76, 16.43)                             |
| <b>HBV DNA and HIV RNA suppression</b> | No   | 20                         | 3                     | 44               | 6.80 (2.19, 21.07)                             |
|                                        | Yes  | 37                         | 8                     | 102              | 7.86 (3.93, 15.72)                             |
| <b>Histological activity index</b>     | 0-4  | 51                         | 9                     | 145              | 6.20 (3.23, 11.92)                             |
|                                        | ≥5   | 16                         | 4                     | 29               | 13.64 (5.12, 36.34)                            |
| <b>Ishak fibrosis score</b>            | 0    | 16                         | 0                     | 40               | 0 (-)                                          |
|                                        | 1-2  | 38                         | 8                     | 103              | 7.77 (3.89, 15.54)                             |
|                                        | 3-4  | 13                         | 5                     | 31               | 16.04 (6.68, 38.54)                            |
| <b>Cirrhosis</b>                       | No   | 63                         | 10                    | 162              | 6.18 (3.32, 11.48)                             |
|                                        | Yes  | 4                          | 3                     | 13               | 23.80 (7.68, 73.81)                            |
| <b>Fatty liver disease</b>             | No   | 44                         | 9                     | 115              | 7.81 (4.07, 15.02)                             |
|                                        | Yes  | 23                         | 4                     | 59               | 6.75 (2.53, 17.97)                             |

Abbreviations: ALT, Alanine aminotransferase; APRI, AST-platelet-ratio index; AST, Aspartate aminotransferase; DNA, Deoxyribonucleic acid; FIB-4, Fibrosis index based on four factors; HBsAg, Hepatitis B surface antigen; HBV, Hepatitis B virus; HIV, Human immunodeficiency virus; PYR, person-years; q, Quantitative; RNA, Ribonucleic acid; ULN, Upper limit of normal.

<sup>a</sup>Confidence interval (CI) based on the Wald test.

**sTable 5.** Select viral and clinical markers, by time point.

|                                                | Baseline                         | Week 24                         | Week 48                         | Week 72                         | Week 96                         | Week 120                        | Week 144                        | Week 168                        | Week 192                        | P <sup>a</sup> |
|------------------------------------------------|----------------------------------|---------------------------------|---------------------------------|---------------------------------|---------------------------------|---------------------------------|---------------------------------|---------------------------------|---------------------------------|----------------|
| <b>Continuous</b>                              | <b>Mean (95% CI)</b>             |                                 |                                 |                                 |                                 |                                 |                                 |                                 |                                 |                |
| HBsAg (log10 IU/mL) <sup>b</sup>               | n=112<br>3.2 (3.0, 3.4)          |                                 | n=83<br>3.2 (2.9, 3.4)          |                                 | n=76<br>3.0 (2.8, 3.2)          |                                 | n=64<br>2.9 (2.8, 3.2)          |                                 | n=48<br>2.8 (2.5, 3.1)          | <.001          |
| HBeAg (log10 IU/mL)<br>among positive HBeAg    | n=69<br>1.4 (1.1, 1.6)           | n=57<br>1.2 (0.9, 1.4)          | n=49<br>1.2 (0.8, 1.6)          | n=44<br>1.2 (0.9, 1.6)          | n=42<br>1.0 (0.7, 1.2)          | n=32<br>0.9 (0.5, 1.3)          | n=32<br>0.9 (0.7, 1.1)          | n=22<br>0.8 (0.5, 1.1)          | n=27<br>0.8 (0.4, 1.0)          | 0.01           |
| HBV DNA (log10 IU/mL)                          | n=114<br>2.0 (1.7, 2.6)          | n=100<br>1.8 (1.5, 2.2)         | n=92<br>1.8 (1.5, 2.1)          | n=88<br>1.7 (1.4, 2.4)          | n=81<br>1.5 (1.2, 1.7)          | n=78<br>1.5 (1.2, 1.7)          | n=74<br>1.4 (1.1, 1.7)          | n=59<br>1.4 (1.1, 1.7)          | n=49<br>1.0 (0.8, 1.4)          | <.001          |
| ALT (log2 U/L)                                 | n=110<br>4.9 (4.7, 5.0)          | n=97<br>4.9 (4.7, 5.1)          | n=88<br>4.9 (4.7, 5.1)          | n=81<br>4.8 (4.6, 5.1)          | n=73<br>4.7 (4.6, 4.9)          | n=71<br>4.7 (4.5, 4.9)          | n=69<br>4.8 (4.6, 5.0)          | n=59<br>4.7 (4.5, 4.8)          | n=45<br>4.6 (4.4, 4.8)          | 0.046          |
| AST (log2 U/L)                                 | n=110<br>4.9 (4.8, 5.1)          | n=97<br>5.0 (4.9, 5.1)          | n=88<br>5.0 (4.9, 5.1)          | n=80<br>5.0 (4.9, 5.1)          | n=73<br>4.9 (4.8, 5.0)          | n=73<br>4.9 (4.7, 5.0)          | n=69<br>5.0 (4.8, 5.2)          | n=60<br>4.9 (4.7, 5.0)          | n=45<br>4.8 (4.6, 5.1)          | 0.80           |
| AST/ALT ratio                                  | n=110<br>1.1 (1.0, 1.2)          | n=97<br>1.1 (1.1, 1.2)          | n=88<br>1.2 (1.1, 1.2)          | n=80<br>1.2 (1.1, 1.3)          | n=73<br>1.2 (1.1, 1.3)          | n=71<br>1.2 (1.2, 1.3)          | n=69<br>1.3 (1.1, 1.5)          | n=59<br>1.2 (1.1, 1.4)          | n=45<br>1.2 (1.1, 1.4)          | 0.008          |
| Platelets (x10 <sup>3</sup> /mm <sup>3</sup> ) | n=112<br>210.3<br>(201.3, 217.8) | n=92<br>218.1<br>(205.6, 229.3) | n=87<br>211.5<br>(202.9, 224.4) | n=69<br>214.3<br>(194.8, 225.3) | n=71<br>212.8<br>(197.0, 232.2) | n=66<br>217.1<br>(201.7, 230.9) | n=68<br>206.1<br>(191.6, 219.0) | n=57<br>217.6<br>(199.3, 241.1) | n=45<br>217.1<br>(201.3, 238.1) | 0.10           |
| APRI                                           | n=110<br>0.4 (0.4, 0.5)          | n=89<br>0.4 (0.4, 0.5)          | n=83<br>0.5 (0.4, 0.6)          | n=66<br>0.5 (0.4, 0.6)          | n=70<br>0.5 (0.4, 0.6)          | n=65<br>0.5 (0.4, 0.7)          | n=67<br>0.5 (0.4, 0.6)          | n=56<br>0.4 (0.4, 0.5)          | n=44<br>0.5 (0.4, 0.8)          | 0.07           |
| FIB-4                                          | n=110<br>1.5 (1.0, 1.9)          | n=89<br>1.5 (1.0, 1.8)          | n=83<br>1.7 (1.0, 2.1)          | n=66<br>1.7 (1.0, 2.1)          | n=70<br>1.7 (1.0, 2.0)          | n=63<br>1.8 (1.0, 1.9)          | n=67<br>1.9 (1.1, 2.0)          | n=55<br>1.7 (1.1, 2.1)          | n=44<br>1.7 (1.1, 2.0)          | 0.009          |
| VCTE (kPa) <sup>c</sup>                        | n=66<br>6.3 (5.6, 7.5)           |                                 | n=47<br>7.0 (5.3, 9.5)          |                                 | n=48<br>6.5 (5.3, 8.3)          |                                 | n=43<br>7.2 (5.5, 9.6)          |                                 | n=39<br>7.0 (5.8, 9.0)          | 0.24           |
| <b>Ordinal</b>                                 | <b>% (95% CI)</b>                |                                 |                                 |                                 |                                 |                                 |                                 |                                 |                                 |                |
| HBV DNA (IU/mL)                                | n=114<br>65.6<br>(56.0, 73.7)    | n=109<br>78.4<br>(69.3, 88.1)   | n=100<br>78.6<br>(67.2, 88.6)   | n=97<br>82.9<br>(69.3, 90.9)    | n=87<br>84.6<br>(73.1, 93.0)    | n=82<br>82.7<br>(70.6, 89.9)    | n=77<br>84.1<br>(71.8, 92.8)    | n=64<br>91.5<br>(76.4, 97.6)    | N=50<br>86.9<br>(73.0, 98.2)    | <.001          |
| < 20                                           | 21.8<br>(10.8, 30.1)             | 11.3<br>(0.6, 18.1)             | 14.1<br>(6.0, 32.4)             | 11.6<br>(5.5, 21.2)             | 13.1<br>(6.1, 23.0)             | 14.8<br>(5.2, 28.4)             | 15.7<br>(9.0, 30.0)             | 6.5<br>(1.6, 19.6)              | 10.7<br>(3.3, 25.8)             |                |
| 20-999                                         | 22.2<br>(18.7, 33.8)             | 16.9<br>(11.3, 26.5)            | 11.5<br>(4.9, 20.7)             | 11.3<br>(6.4, 20.8)             | 7.7<br>(3.4, 12.4)              | 8.6<br>(1.9, 14.7)              | 7.5<br>(2.6, 12.3)              | 4.5<br>(0.2, 15.3)              | 5.9<br>(1.9, 17.5)              |                |
| > 1000                                         |                                  |                                 |                                 |                                 |                                 |                                 |                                 |                                 |                                 |                |
| HBV DNA suppression<br>status <sup>e</sup>     | n=94<br>77.8<br>(54.8, 82.6)     | n=84<br>85.1<br>(61.1, 93.8)    | n=81<br>85.0<br>(52.6, 90.2)    | n=74<br>87.5<br>(55.7, 92.5)    | n=61<br>93.0<br>(66.0, 95.9)    | n=58<br>85.5<br>(17.4, 90.6)    | n=55<br>85.4<br>(0.0, 90.3)     | n=45<br>88.9<br>(0.0, 92.3)     | n=37<br>93.8<br>(31.8, 97.2)    | 0.07           |
| Suppressed                                     | 1.9                              | 3.6                             | 2.0                             | 2.1                             | 1.1                             | 0.0                             | 0.2                             | 2.1                             | 0.2                             |                |
| Incomplete suppression                         |                                  |                                 |                                 |                                 |                                 |                                 |                                 |                                 |                                 |                |

|                |              |             |             |             |             |             |             |             |             |
|----------------|--------------|-------------|-------------|-------------|-------------|-------------|-------------|-------------|-------------|
|                | (0.2, 8.6)   | (0.5, 25.5) | (0.1, 30.2) | (0.1, 30.9) | (0.0, 27.2) | (0.0, 94.2) | (0.0, 40.4) | (0.0, 85.2) | (0.0, 93.4) |
|                | 20.4         | 11.2        | 13.0        | 10.4        | 6.0         | 14.5        | 14.4        | 9.0         | 6.0         |
| Not suppressed | (11.7, 28.6) | (0.1, 17.3) | (0.0, 36.9) | (2.1, 27.9) | (1.2, 14.8) | (0.0, 26.4) | (0.6, 93.7) | (0.7, 94.7) | (1.0, 15.5) |

Abbreviations: ALT, alanine aminotransferase; APRI, aspartate aminotransferase to platelet ratio index; FIB-4, fibrosis index based on four factors

HBeAg, Hepatitis B e-antigen; HBsAg, Hepatitis B surface antigen; HBV, Hepatitis B virus; VCTE, vibration controlled transient elastography.

<sup>a</sup> The number of participants with valid data is shown. Fibroscan data was excluded if the participant did not fast  $\geq 3$  hours, the IQR/median ratio was  $\geq 0.3$  or a data point need to confirm these criteria was missing.

<sup>b</sup> For a linear trend over time from a mixed model, with each outcome as a repeated measure, time and site (which was related to missing follow-up data) entered as discrete fixed effects, and a random intercept.

<sup>c</sup> Measured every 48 weeks.

<sup>d</sup> Measured at baseline, week 96 and week 192 assessments.

<sup>e</sup> Categorized as suppressed (HBV DNA  $< 1000$  IU/mL, HIV RNA  $< 20$  copies/mL), not suppressed (HBV DNA  $> 1000$  IU/mL, HIV RNA  $> 20$  copies/mL), and incomplete suppression (HBV DNA was  $> 1000$  IU/mL while HIV RNA was  $< 20$  copies/mL).

**sTable 6.** Individual-level change in histological activity index (HAI)

**Worse** 
**No change** 
**Better**

| First Biopsy    | Second biopsy |           |           |           |          |          |          |          |                | Total     |
|-----------------|---------------|-----------|-----------|-----------|----------|----------|----------|----------|----------------|-----------|
|                 | 0             | 1         | 2         | 3         | 4        | 5        | 6        | 7        | 8 <sup>a</sup> |           |
| 0               | 0             | 0         | 1         | 0         | 0        | 0        | 0        | 0        | 0              | 1         |
| 1               | 1             | 2         | 3         | 2         | 0        | 0        | 0        | 0        | 0              | 8         |
| 2               | 1             | 4         | 2         | 3         | 1        | 0        | 0        | 0        | 0              | 11        |
| 3               | 0             | 5         | 4         | 7         | 2        | 2        | 0        | 0        | 0              | 20        |
| 4               | 1             | 2         | 1         | 5         | 1        | 1        | 1        | 0        | 0              | 12        |
| 5               | 0             | 0         | 1         | 1         | 1        | 1        | 1        | 0        | 0              | 5         |
| 6               | 0             | 0         | 0         | 1         | 0        | 0        | 0        | 0        | 0              | 1         |
| 7               | 0             | 0         | 0         | 1         | 0        | 0        | 0        | 0        | 0              | 1         |
| 8               | 0             | 0         | 0         | 0         | 0        | 0        | 0        | 0        | 0              | 0         |
| 9               | 0             | 0         | 0         | 0         | 0        | 0        | 0        | 0        | 1              | 1         |
| 10              | 0             | 0         | 0         | 0         | 0        | 0        | 0        | 1        | 0              | 1         |
| 11              | 0             | 0         | 0         | 0         | 0        | 0        | 0        | 0        | 0              | 0         |
| 12              | 0             | 0         | 0         | 0         | 0        | 0        | 0        | 0        | 0              | 0         |
| 13              | 0             | 0         | 0         | 0         | 0        | 0        | 0        | 0        | 0              | 0         |
| 14 <sup>a</sup> | 0             | 0         | 0         | 0         | 1        | 0        | 0        | 0        | 0              | 1         |
| <b>Total</b>    | <b>3</b>      | <b>13</b> | <b>12</b> | <b>20</b> | <b>6</b> | <b>4</b> | <b>2</b> | <b>1</b> | <b>1</b>       | <b>62</b> |

<sup>a</sup>No participants had HAI values above 14 at first biopsy or above 8 at second biopsy.

**sTable 7.** Individual-level change in portal inflammation score

**Worse** 
**No change** 
**Better**

| First biopsy | Second biopsy |           |          |          | Total     |
|--------------|---------------|-----------|----------|----------|-----------|
|              | 0             | 1         | 2        | 3        |           |
| 0            | 3             | 4         | 0        | 0        | 7         |
| 1            | 10            | 30        | 5        | 0        | 45        |
| 2            | 1             | 6         | 2        | 0        | 9         |
| 3            | 0             | 0         | 1        | 0        | 1         |
| <b>Total</b> | <b>14</b>     | <b>40</b> | <b>8</b> | <b>0</b> | <b>62</b> |



**sTable 8.** Individual-level change in periportal inflammation score

**Worse** **No change** **Better**

| First biopsy | Second biopsy |    |   |   |   | Total |
|--------------|---------------|----|---|---|---|-------|
|              | 0             | 1  | 2 | 3 | 4 |       |
| 0            | 14            | 6  | 0 | 0 | 0 | 20    |
| 1            | 12            | 21 | 3 | 0 | 0 | 36    |
| 2            | 1             | 2  | 0 | 0 | 0 | 3     |
| 3            | 0             | 0  | 1 | 1 | 0 | 2     |
| 4            | 0             | 0  | 1 | 0 | 0 | 1     |
| <b>Total</b> | 27            | 29 | 5 | 1 | 0 | 62    |

**sTable 9.** Individual-level change in lobular inflammation score

**Worse** **No change** **Better**

| First biopsy | Second biopsy |    |    |   |   | Total |
|--------------|---------------|----|----|---|---|-------|
|              | 0             | 1  | 2  | 3 | 4 |       |
| 0            | 1             | 6  | 0  | 0 | 0 | 7     |
| 1            | 5             | 28 | 5  | 0 | 0 | 38    |
| 2            | 1             | 6  | 5  | 0 | 0 | 12    |
| 3            | 0             | 2  | 1  | 1 | 0 | 4     |
| 4            | 0             | 0  | 0  | 1 | 0 | 1     |
| <b>Total</b> | 7             | 42 | 11 | 2 | 0 | 62    |

**sTable 10.** Individual-level change in confluent necrosis score

**Worse**

| First biopsy | Second biopsy |       |
|--------------|---------------|-------|
|              | 0             | Total |
| 0            | 57            | 57    |
| 1            | 2             | 2     |
| 2            | 1             | 1     |
| 3            | 1             | 1     |
| 4            | 0             | 0     |
| 5            | 0             | 0     |
| 6            | 1             | 1     |
| <b>Total</b> | 62            | 62    |

**sTable 11.** Individual-level change in fibrosis score

**Worse** 
**No change** 
**Better**

| First biopsy | Second biopsy |    |   |    |   |   |   | Total |
|--------------|---------------|----|---|----|---|---|---|-------|
|              | 0             | 1  | 2 | 3  | 4 | 5 | 6 |       |
| 0            | 10            | 2  | 0 | 0  | 1 | 0 | 0 | 13    |
| 1            | 16            | 6  | 0 | 5  | 0 | 0 | 0 | 27    |
| 2            | 1             | 4  | 1 | 0  | 0 | 0 | 1 | 7     |
| 3            | 2             | 1  | 2 | 5  | 1 | 1 | 0 | 12    |
| 4            | 0             | 0  | 0 | 0  | 1 | 0 | 0 | 1     |
| 5            | 0             | 0  | 0 | 0  | 0 | 0 | 0 | 0     |
| 6            | 0             | 0  | 0 | 0  | 0 | 1 | 0 | 1     |
| <b>Total</b> | 29            | 13 | 3 | 10 | 3 | 2 | 1 | 61    |
